# Supplementary material for: Effect of Microbial Phytase on Ileal Digestibility of Minerals, Plasma and Urine Metabolites, and Bone Mineral Concentrations in Growing–Finishing Pigs
Source: MDPI journal article supplement (doi:10.3390/ani12101294), 2022-05-18
Supplement: s1 [file s1]

# Effect of microbial phytase on ileal digestibility of minerals, plasma and urine metabolites, and bone mineral concentrations in growing-finishing pigs

Anna Czech, Wioletta Samolińska, Ewa Tomaszewska, Siemowit Muszyński, Eugeniusz R. Grela

## Supplementary materials

**Table S1.** Correlations between content of minerals in the chyme and their content in the blood, femur, faeces and urine.

| Treatment <sup>1</sup> |    | NC <sup>2</sup> | 250 <sup>3</sup> | 500 <sup>3</sup> | 1000 <sup>3</sup> | 1500 <sup>3</sup> | PC <sup>4</sup> | NC <sup>2</sup> | 250 <sup>3</sup> | 500 <sup>3</sup> | 1000 <sup>3</sup> | 1500 <sup>3</sup> | PC <sup>4</sup> |
|------------------------|----|-----------------|------------------|------------------|-------------------|-------------------|-----------------|-----------------|------------------|------------------|-------------------|-------------------|-----------------|
| Grower                 |    |                 |                  |                  |                   |                   | Finisher        |                 |                  |                  |                   |                   |                 |
| Chyme /blood           | P  | -0.467          | 0.612            | -0.578           | <b>-0.789</b>     | <b>0.919</b>      | <b>-0.987</b>   | -0.515          | <b>-0.934</b>    | <b>0.982</b>     | -0.688            | 0.571             | <b>-1.000</b>   |
|                        | Ca | 0.099           | <b>0.858</b>     | 0.126            | 0.538             | <b>0.995</b>      | -0.342          | -0.668          | <b>0.996</b>     | -0.194           | -0.051            | -0.485            | 0.198           |
|                        | Mg | -0.761          | -0.237           | <b>-0.990</b>    | -0.020            | -0.557            | <b>-0.857</b>   | -0.277          | -0.069           | -0.371           | <b>0.945</b>      | <b>-0.971</b>     | 0.511           |
|                        | Cu | <b>0.918</b>    | 0.409            | 0.266            | 0.305             | -0.713            | <b>-0.903</b>   | -0.742          | -0.263           | <b>-0.890</b>    | 0.092             | -0.577            | 0.411           |
|                        | Zn | 0.256           | 0.507            | <b>0.999</b>     | <b>-0.986</b>     | 0.404             | <b>0.983</b>    | 0.302           | <b>-0.967</b>    | -0.791           | 0.106             | -0.170            | 0.062           |
|                        | Fe | 0.088           | <b>0.855</b>     | -0.445           | <b>0.820</b>      | -0.733            | -0.579          | -0.603          | 0.364            | <b>0.959</b>     | <b>0.984</b>      | <b>0.978</b>      | 0.638           |
| Chyme /                | P  | <b>-0.965</b>   | 0.265            | 0.488            | -0.486            | 0.256             | 0.777           | <b>0.961</b>    | <b>0.946</b>     | -0.416           | 0.695             | -0.047            | <b>0.968</b>    |

|       |    |              |               |        |              |               |        |               |               |              |              |               |               |
|-------|----|--------------|---------------|--------|--------------|---------------|--------|---------------|---------------|--------------|--------------|---------------|---------------|
| femur | Ca | -0.178       | <b>0.965</b>  | -0.236 | <b>0.930</b> | 0.001         | 0.230  | 0.170         | <b>0.959</b>  | -0.394       | <b>0.878</b> | <b>-0.862</b> | <b>-0.897</b> |
|       | Mg | -0.118       | -0.888        | -0.235 | 0.747        | <b>-1.000</b> | 0.407  | 0.771         | 0.808         | 0.090        | <b>0.913</b> | <b>-0.983</b> | 0.776         |
|       | Cu | <b>0.903</b> | <b>-1.000</b> | -0.657 | <b>0.908</b> | -0.223        | -0.794 | 0.589         | <b>-0.892</b> | <b>0.982</b> | -0.033       | -0.158        | <b>-0.993</b> |
|       | Zn | -0.191       | 0.560         | 0.274  | <b>0.729</b> | <b>-0.963</b> | -0.420 | <b>-0.876</b> | -0.604        | 0.699        | -0.999       | <b>-0.882</b> | <b>0.998</b>  |
|       | Fe | -0.668       | 0.320         | -0.425 | 0.388        | -0.507        | -0.707 | <b>1.000</b>  | <b>-0.877</b> | -0.717       | <b>0.993</b> | -0.272        | <b>-0.891</b> |

|                   |    |        |               |              |               |              |              |               |               |              |              |               |               |
|-------------------|----|--------|---------------|--------------|---------------|--------------|--------------|---------------|---------------|--------------|--------------|---------------|---------------|
| Chyme /<br>faeces | P  | 0.386  | 0.247         | -0.321       | -0.109        | 0.587        | 0.175        | 0.056         | <b>-0.918</b> | -0.288       | <b>0.825</b> | <b>1.000</b>  | -0.690        |
|                   | Ca | -0.488 | -0.059        | 0.663        | <b>-0.637</b> | <b>0.956</b> | -0.394       | <b>-0.848</b> | <b>0.762</b>  | -0.587       | <b>0.814</b> | <b>0.983</b>  | <b>-0.843</b> |
|                   | Mg | -0.352 | -0.159        | -0.677       | 0.680         | 0.174        | -0.305       | 0.431         | <b>0.995</b>  | <b>0.955</b> | -0.420       | -0.769        | -0.087        |
|                   | Cu | 0.760  | <b>0.851</b>  | 0.026        | 0.325         | 0.266        | 0.057        | <b>0.934</b>  | 0.149         | -0.058       | -0.139       | <b>-0.942</b> | 0.576         |
|                   | Zn | 0.038  | 0.606         | <b>0.992</b> | <b>0.999</b>  | -0.575       | <b>0.814</b> | <b>-0.922</b> | <b>0.952</b>  | -0.674       | -0.373       | <b>0.966</b>  | -0.562        |
|                   | Fe | 0.441  | <b>-0.847</b> | 0.433        | 0.352         | -0.615       | <b>0.997</b> | -0.384        | 0.408         | <b>0.957</b> | -0.174       | -0.486        | -0.232        |

|               |    |              |              |               |               |              |              |        |              |        |               |               |               |
|---------------|----|--------------|--------------|---------------|---------------|--------------|--------------|--------|--------------|--------|---------------|---------------|---------------|
| Chyme / urine | P  | 0.771        | <b>0.995</b> | -0.078        | -0.123        | <b>0.951</b> | 0.276        | 0.134  | -0.153       | 0.384  | 0.439         | <b>0.971</b>  | <b>1.000</b>  |
|               | Ca | <b>0.962</b> | 0.175        | <b>-0.967</b> | <b>-0.801</b> | -0.777       | <b>0.819</b> | -0.039 | <b>1.000</b> | 0.247  | <b>-0.835</b> | <b>0.851</b>  | <b>0.978</b>  |
|               | Mg | 0.732        | 0.282        | <b>0.909</b>  | 0.387         | 0.637        | <b>0.946</b> | 0.863  | <b>0.998</b> | -0.372 | <b>0.999</b>  | -0.729        | <b>-0.999</b> |
|               | Cu | <b>0.878</b> | -0.556       | 0.748         | -0.479        | -0.006       | -0.444       | -0.124 | 0.632        | -0.366 | -0.129        | <b>-0.908</b> | -0.667        |

|    |        |               |               |              |              |               |        |        |              |              |        |       |
|----|--------|---------------|---------------|--------------|--------------|---------------|--------|--------|--------------|--------------|--------|-------|
| Zn | -0.503 | <b>-0.999</b> | 0.196         | <b>0.862</b> | <b>0.998</b> | <b>0.940</b>  | -0.529 | -0.213 | <b>0.990</b> | -0.139       | -0.671 | 0.468 |
| Fe | -0.246 | <b>0.991</b>  | <b>-1.000</b> | -0.069       | 0.315        | <b>-0.876</b> | 0.533  | -0.266 | <b>0.964</b> | <b>0.750</b> | 0.367  | 0.055 |

Color-coded correlation matrix. Bold values indicate significant correlations ( $P < 0.05$ ); <sup>1</sup> Diets 1–5 were P-deficient diets with 0 (NC), 250, 500, 1000, or 1500 phytase units FTU/kg, respectively. A sixth diet (positive control; PC) was formulated with increased dicalcium phosphate to meet the nutrient requirements of the pigs; <sup>2</sup> NC – negative control; <sup>3</sup> Phytase level added to NC; <sup>4</sup> PC – positive control.

**Table S2.** Correlations between content of minerals in the blood and their content in the femur, faeces and urine.

| Treatment <sup>1</sup> |    | NC <sup>2</sup> | 250 <sup>3</sup> | 500 <sup>3</sup> | 1000 <sup>3</sup> | 1500 <sup>3</sup> | PC <sup>4</sup> | NC <sup>2</sup> | 250 <sup>3</sup> | 500 <sup>3</sup> | 1000 <sup>3</sup> | 1500 <sup>3</sup> | PC <sup>4</sup> |
|------------------------|----|-----------------|------------------|------------------|-------------------|-------------------|-----------------|-----------------|------------------|------------------|-------------------|-------------------|-----------------|
|                        |    | grower          |                  |                  |                   |                   |                 | finisher        |                  |                  |                   |                   |                 |
| Blood /<br>femur       | P  | 0.684           | -0.601           | 0.430            | -0.154            | -0.145            | -0.868          | -0.733          | <b>-0.999</b>    | -0.236           | <b>-1.000</b>     | <b>-0.847</b>     | <b>-0.971</b>   |
|                        | Ca | <b>0.962</b>    | <b>0.963</b>     | <b>0.930</b>     | 0.811             | 0.106             | <b>-0.993</b>   | 0.619           | <b>0.928</b>     | <b>0.978</b>     | 0.434             | <b>0.862</b>      | -0.611          |
|                        | Mg | 0.233           | -0.742           | <b>0.929</b>     | 0.649             | 0.564             | 0.025           | <b>-0.825</b>   | 0.781            | <b>0.891</b>     | 0.729             | <b>0.998</b>      | <b>0.939</b>    |
|                        | Cu | 0.658           | -0.402           | -0.236           | -0.122            | 0.843             | -0.891          | <b>-0.979</b>   | -0.201           | <b>-0.789</b>    | <b>-0.998</b>     | <b>0.898</b>      | -0.300          |
|                        | Zn | <b>0.900</b>    | -0.430           | 0.627            | <b>-0.833</b>     | -0.637            | -0.496          | -0.725          | 0.381            | -0.115           | -0.055            | -0.316            | 0.126           |
|                        | Fe | 0.683           | 0.765            | <b>0.984</b>     | 0.845             | -0.215            | <b>0.970</b>    | -0.602          | -0.767           | <b>-0.885</b>    | <b>0.956</b>      | -0.468            | <b>-0.918</b>   |
|                        |    |                 |                  |                  |                   |                   |                 |                 |                  |                  |                   |                   |                 |
| Blood /<br>faeces      | P  | 0.741           | 0.147            | -0.588           | -0.525            | <b>0.859</b>      | -0.016          | -0.885          | 0.715            | -0.101           | <b>-0.978</b>     | 0.596             | 0.700           |
|                        | Ca | <b>0.987</b>    | -0.500           | <b>0.826</b>     | <b>-0.992</b>     | <b>0.920</b>      | <b>0.998</b>    | 0.173           | 0.698            | <b>0.908</b>     | 0.539             | -0.313            | -0.695          |
|                        | Mg | 0.220           | <b>0.999</b>     | <b>0.774</b>     | 0.719             | <b>-0.914</b>     | 0.752           | 0.747           | -0.167           | -0.080           | -0.694            | <b>0.900</b>      | <b>-0.901</b>   |
|                        | Cu | <b>0.990</b>    | <b>0.999</b>     | <b>0.971</b>     | <b>-0.802</b>     | <b>-0.866</b>     | 0.378           | -0.454          | <b>0.915</b>     | -0.404           | <b>-0.999</b>     | <b>0.817</b>      | <b>0.982</b>    |
|                        | Zn | -0.614          | 0.711            | <b>0.997</b>     | <b>-0.976</b>     | <b>-0.981</b>     | <b>0.906</b>    | 0.091           | <b>-0.999</b>    | <b>0.985</b>     | <b>-0.962</b>     | 0.091             | 0.790           |
|                        | Fe | 0.455           | 0.757            | 0.615            | -0.247            | <b>0.987</b>      | -0.645          | -0.504          | -0.701           | <b>0.835</b>     | 0.006             | -0.292            | <b>-0.897</b>   |

| Blood /<br>urine | P  | <b>-0.923</b> | 0.533         | 0.859        | 0.707         | <b>0.996</b> | -0.119       | <b>-0.918</b> | -0.210        | 0.551        | <b>-0.954</b> | 0.360         | <b>-1.000</b> |
|------------------|----|---------------|---------------|--------------|---------------|--------------|--------------|---------------|---------------|--------------|---------------|---------------|---------------|
|                  | Ca | -0.178        | 0.656         | -0.376       | 0.075         | -0.707       | 0.258        | 0.769         | <b>0.995</b>  | <b>0.903</b> | -0.506        | <b>-0.872</b> | 0.397         |
|                  | Mg | 0.648         | -0.800        | -0.841       | <b>-0.930</b> | 0.284        | -0.643       | 0.245         | -0.010        | <b>1.000</b> | <b>0.947</b>  | <b>0.872</b>  | -0.509        |
|                  | Cu | 0.617         | <b>-0.986</b> | <b>0.839</b> | <b>-0.978</b> | 0.706        | 0.786        | -0.573        | <b>-0.914</b> | 0.750        | <b>0.975</b>  | <b>0.866</b>  | <b>0.405</b>  |
|                  | Zn | <b>-0.964</b> | -0.484        | 0.246        | <b>-0.934</b> | 0.347        | <b>0.986</b> | 0.649         | 0.455         | -0.698       | <b>0.970</b>  | -0.617        | <b>-0.853</b> |
|                  | Fe | <b>-0.987</b> | <b>0.917</b>  | 0.426        | 0.627         | 0.415        | 0.115        | 0.353         | <b>-0.995</b> | <b>0.850</b> | <b>0.857</b>  | 0.554         | 0.804         |

Note: See in table S1.

**Table S3.** Correlations between content of minerals in the femur and their content in the faeces and urine.

| Treatment <sup>1</sup> |    | NC <sup>2</sup> | 250 <sup>3</sup> | 500 <sup>3</sup> | 1000 <sup>3</sup> | 1500 <sup>3</sup> | PC <sup>4</sup> | NC <sup>2</sup> | 250 <sup>3</sup> | 500 <sup>3</sup> | 1000 <sup>3</sup> | 1500 <sup>3</sup> | PC <sup>4</sup> |
|------------------------|----|-----------------|------------------|------------------|-------------------|-------------------|-----------------|-----------------|------------------|------------------|-------------------|-------------------|-----------------|
|                        |    | Grower          |                  |                  |                   |                   |                 | Finisher        |                  |                  |                   |                   |                 |
| Femur<br>/faeces       | P  | 0.017           | 0.702            | <b>-0.983</b>    | <b>0.922</b>      | -0.632            | -0.483          | 0.332           | -0.739           | <b>0.990</b>     | <b>0.979</b>      | -0.078            | <b>-0.850</b>   |
|                        | Ca | <b>0.993</b>    | -0.248           | -0.844           | -0.876            | -0.293            | <b>-0.985</b>   | -0.667          | <b>0.915</b>     | <b>0.975</b>     | <b>0.993</b>      | -0.752            | <b>0.994</b>    |
|                        | Mg | <b>-0.897</b>   | -0.720           | -0.845           | <b>0.995</b>      | -0.181            | <b>0.935</b>    | -0.242          | 0.485            | 0.381            | -0.013            | <b>0.873</b>      | -0.695          |
|                        | Cu | 0.543           | -0.367           | <b>0.925</b>     | 0.691             | <b>-0.999</b>     | <b>-0.999</b>   | 0.261           | -0.580           | -0.243           | <b>0.994</b>      | 0.479             | -0.475          |
|                        | Zn | <b>-0.897</b>   | 0.329            | <b>-0.999</b>    | 0.692             | 0.775             | -0.344          | 0.620           | -0.332           | 0.058            | 0.325             | <b>-0.974</b>     | -0.508          |
|                        | Fe | 0.961           | 0.158            | -0.721           | -0.726            | -0.368            | 0.889           | -0.386          | 0.080            | 0.132            | -0.288            | -0.709            | 0.648           |
| Femur /<br>urine       | P  | <b>-0.912</b>   | 0.356            | 0.832            | <b>-0.807</b>     | -0.054            | -0.390          | 0.404           | 0.176            | 0.680            | <b>0.951</b>      | 0.192             | <b>0.975</b>    |
|                        | Ca | -0.441          | 0.428            | <b>0.987</b>     | -0.523            | 0.629             | -0.370          | <b>0.978</b>    | <b>0.961</b>     | 0.794            | <b>-0.997</b>     | <b>-0.999</b>     | <b>-0.969</b>   |
|                        | Mg | -0.590          | 0.191            | <b>0.987</b>     | -0.324            | -0.632            | 0.638           | 0.344           | 0.616            | <b>0.890</b>     | <b>0.910</b>      | <b>0.842</b>      | -0.774          |
|                        | Cu | <b>0.999</b>    | 0.550            | -0.700           | -0.088            | <b>0.976</b>      | <b>-0.953</b>   | 0.729           | -0.214           | -0.186           | <b>-0.987</b>     | 0.557             | 0.751           |
|                        | Zn | -0.752          | -0.582           | <b>0.937</b>     | <b>0.975</b>      | <b>-0.944</b>     | 0.806           | 0.053           | -0.650           | 0.791            | 0.190             | <b>0.942</b>      | 0.411           |
|                        | Fe | -0.557          | 0.443            | <b>0.936</b>     | <b>0.946</b>      | <b>-0.978</b>     | -0.439          | 0.534           | 0.696            | <b>-0.998</b>    | 0.667             | <b>-0.995</b>     | -0.503          |

Note: See in table S1.
